# Supplementary material
Source: bioRxiv or medRxiv preprint supplement (https://www.biorxiv.org/highwire/filestream/44946/field_highwire_adjunct_files/3/151126-12.pdf)

Chr1

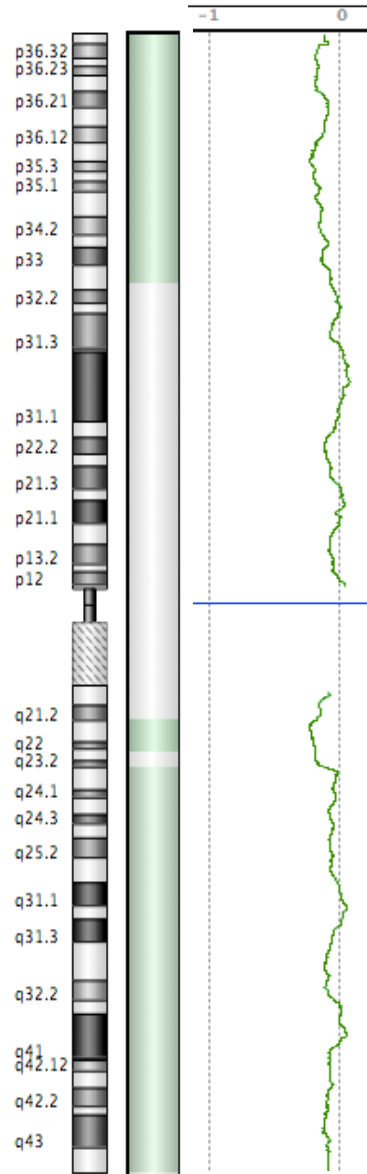

Chr19

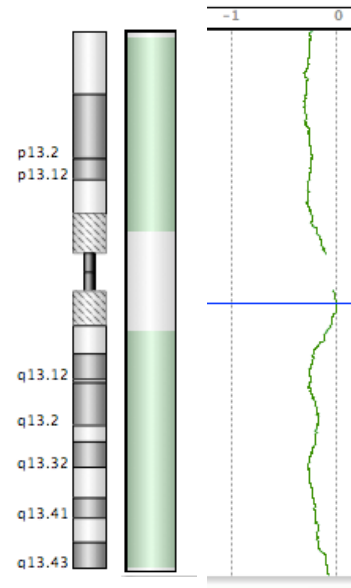

Chr18

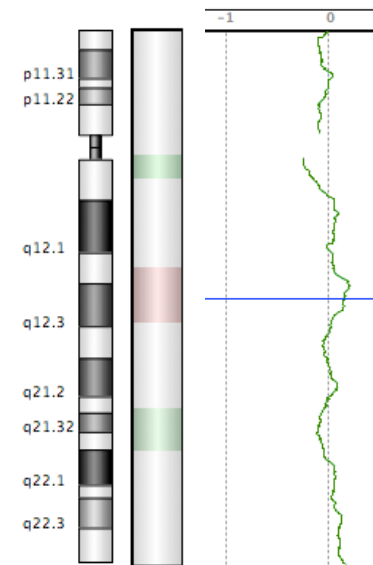

Supplement: Supplementary file [file 151126-12.pdf]
